# Supplementary material
Source: publisher figshare collection journal article supplement (https://brill.figshare.com/articles/dataset/_/9928532)
Supplement: Supplementary file 1 [file 1]

# **Dating the origin and diversification of Pan-Chelidae (Testudines, Pleurodira) under multiple molecular clock approaches**

*J. Alfredo Holley*

Instituto de Diversidad y Evolución Austral (IDEAus-CONICET), Blvd. Alte.

Brown 2915, U9120ACF, Puerto Madryn, Chubut, Argentina

*holley@cenpat-conicet.gob.ar*

*Juliana Sterli*

Museo Paleontológico Egidio Feruglio (MEF-CONICET). Av. Fontana 140, 9100

Trelew, Chubut, Argentina

*Néstor G. Basso*

Instituto de Diversidad y Evolución Austral (IDEAus-CONICET), Blvd. Alte.

Brown 2915, U9120ACF, Puerto Madryn, Chubut, Argentina

## **Supplementary material**

MATERIAL S1      List of GenBank codes for the DNA sequences.

|             |                                                   |
|-------------|---------------------------------------------------|
| MATERIAL S2 | DNA matrix.                                       |
| MATERIAL S3 | Extended methods.                                 |
| MATERIAL S4 | Morphological matrix.                             |
| MATERIAL S5 | BEAST2 xml files used to run the dating analyses. |
